# Supplementary material for: An unexpected dual-response pH probe based on acridine
Source: Royal Society of Chemistry journal article supplement (doi:10.1039/c8ra07283c), 2018-01-01
Supplement: c8ra07283c1.pdf [file c8ra07283c1.pdf]

## Supporting Information to

### An unexpected dual-response pH probe based on acridine

Liang Xu,<sup>a</sup> Xiangzhen Yan,<sup>b</sup> Chunxue Yuan<sup>\*a</sup>

<sup>a</sup> College of Materials Science and Engineering, Tongji University, Caoan Road 4800, Shanghai 201804, P. R. China.

<sup>b</sup> Department of Periodontology, School and hospital of Stomatology, Tongji University, Shanghai Engineering Research Center of Tooth Restoration and Regeneration, Shanghai 200072, P. R. China.

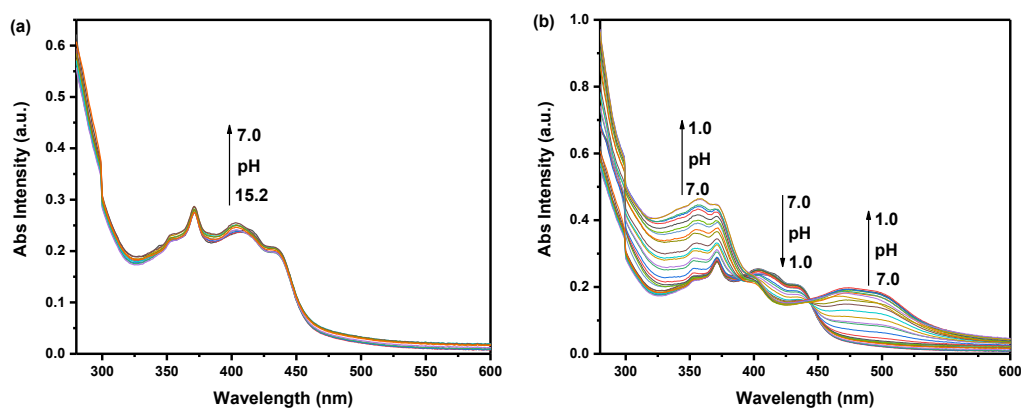

**Fig. S1** UV-vis absorption of TBN (10 μM in H<sub>2</sub>O/DMSO, v/v, 1/2) with different pH values. (a) pH decreased from 15.2 to 11.1. (b) pH decreased from 7.0 to 1.0.

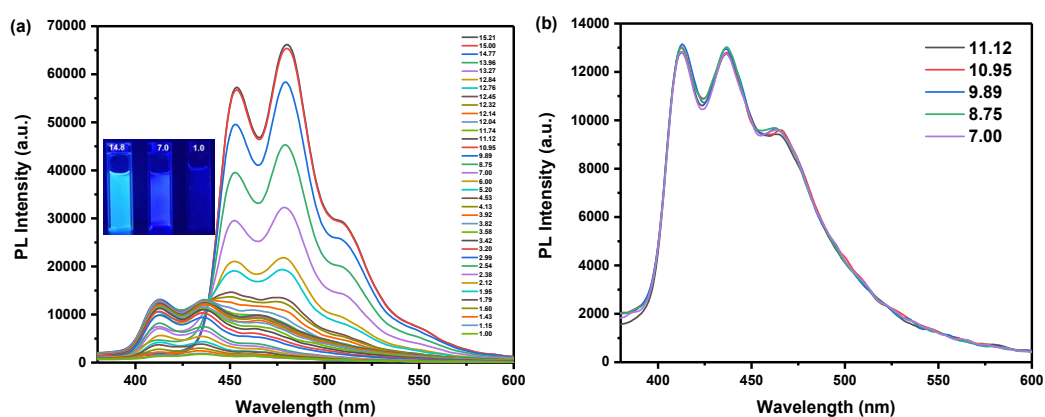

**Fig. S2** Fluorescence spectra of TBN (10 μM in H<sub>2</sub>O/DMSO, v/v, 1/2) with different pH values. (a) pH decreased from 15.2 to 1.0. Inset: photos of TBN under UV lamp (365 nm) at different pH values. (b) pH decreased from 11.1 to 7.0.

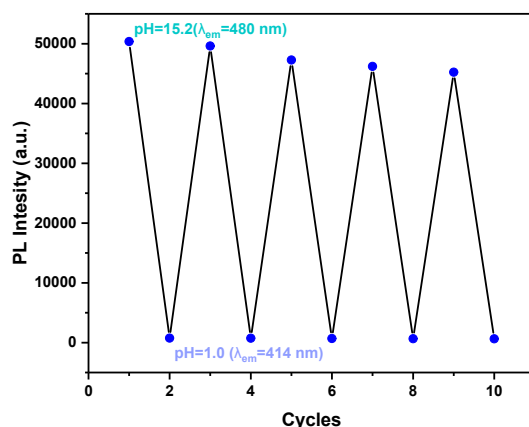

**Fig. S3** The pH reversibility of probe **TBN** with pH 1.0–15.2.

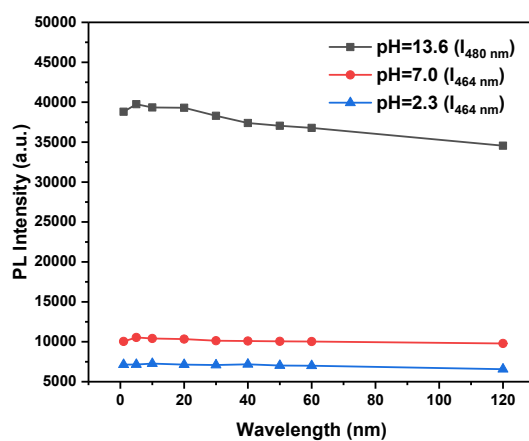

**Fig. S4** Fluorescence intensity *versus* time for probe **TBN** (10  $\mu$ M) various pH values (2.3, 7.0 and 13.6).  $\lambda_{\text{ex}}$  = 320 nm.

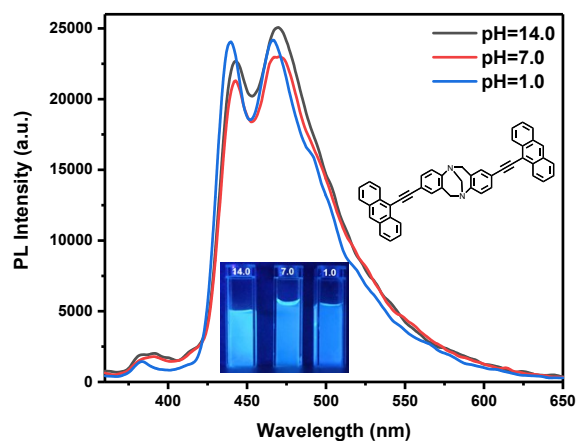

**Fig. S5** Fluorescence spectra of **TBN1** (10  $\mu$ M in H<sub>2</sub>O/DMSO, v/v, 1/2) with different pH values. Insert: photos of **TBN1** under UV lamp (365 nm) at different pH values and molecular structure of **TBN1**.

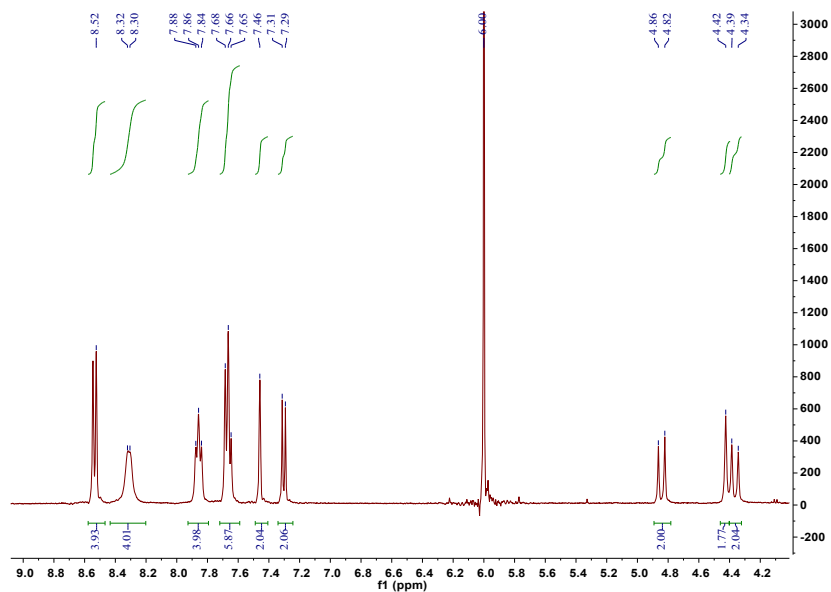

Fig. S6  $^1\text{H}$  NMR spectra of TBN in  $\text{DMSO-}d_6$ .

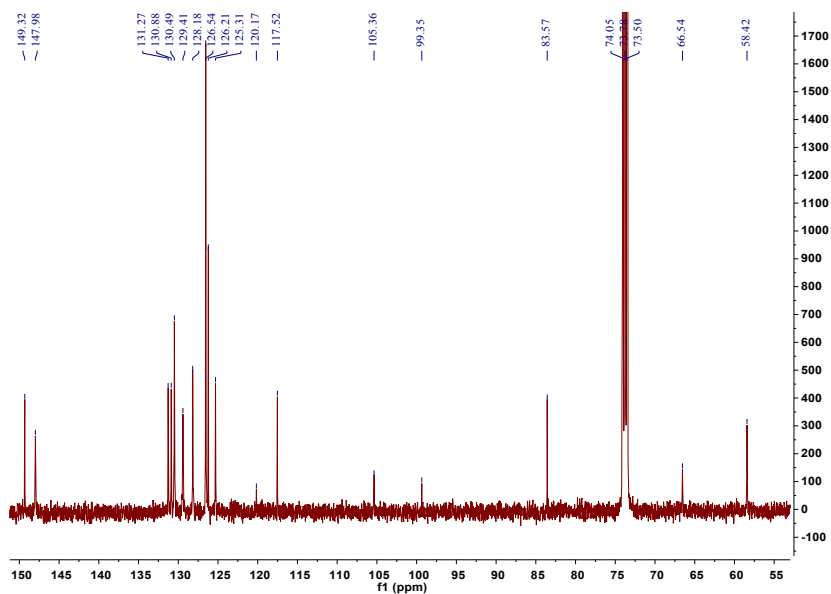

Fig. S7  $^{13}\text{C}$  NMR spectra of TBN in  $\text{DMSO-}d_6$ .

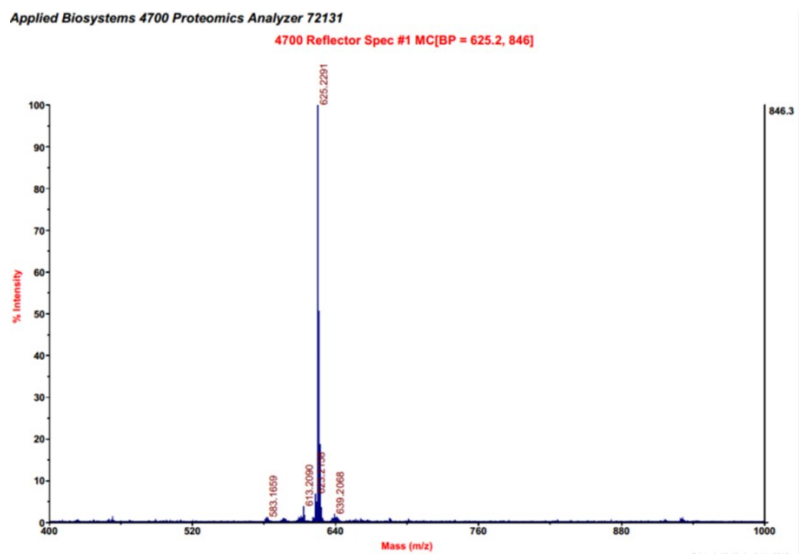

Fig. S8. HRMS spectra of TBN.
